# Supplementary material
Source: Springer Nature journal article supplement (https://www.springermedizin.de/resource/supplementary/12889_2012_4991_MOESM7_ESM.pdf/9493018)

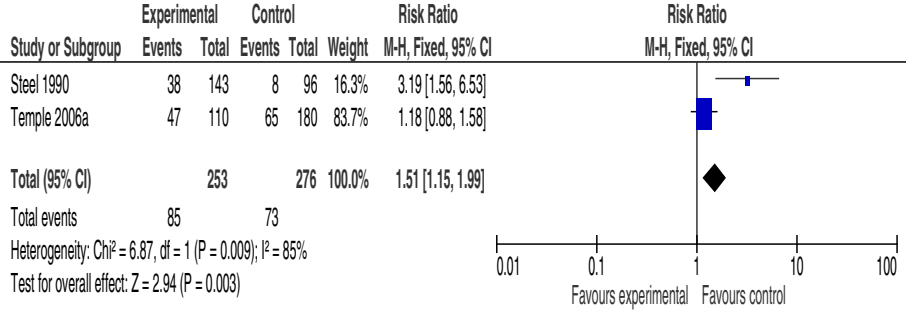

Supplement: MOESM7 [file 9493018]
